# Supplementary material for: Unprecedented pseudo-zeroth-order kinetics of the catecholase-like activity of mixed-valence MnIIMn2III complexes
Source: Royal Society of Chemistry journal article supplement (doi:10.1039/d2nj06357c), 2023-01-01
Supplement: d2nj06357c1.pdf [file d2nj06357c1.pdf]

## SUPPORTING INFORMATION

### Unprecedented *pseudo* zeroth order kinetics of catecholase-like activity of mixed valence Mn<sup>II</sup>Mn<sub>2</sub><sup>III</sup> complexes

Sanchari Dasgupta,<sup>\*,a,b</sup> Suhana Karim,<sup>a</sup> Somanjana Khatua,<sup>c</sup> Amit Adhikary,<sup>a</sup> Krishnendu Acharya,<sup>c</sup> Ennio Zangrando,<sup>d</sup> Suvendu Maity,<sup>e</sup> Debasis Das <sup>\*,a</sup>

<sup>a</sup> Department of Chemistry, University of Calcutta, 92, A. P. C. Road, Kolkata 700009, India

<sup>b</sup> Institut Lavoisier de Versailles, UMR CNRS 8180, Université de Versailles St-Quentin-en-Yvelines, Université Paris-Saclay, 78035 Versailles Cedex, France

<sup>c</sup> Molecular and Applied Mycology and Plant Pathology Laboratory, Centre of Advanced Study, Department of Botany, University of Calcutta, 35, Ballygunge Circular Road, Kolkata 700019, India

<sup>d</sup> Department of Chemical and Pharmaceutical Sciences, University of Trieste, Via L. Giorgieri 1, 34127 Trieste, Italy

<sup>e</sup> Department of Chemistry, R. K. Mission Residential College, Narendrapur, Kolkata 700103, India

**Table S1.** Selected bond distances (Å) and angles (°) for complex **1**.

|             |          |             |          |
|-------------|----------|-------------|----------|
| Mn(1)-O(1)  | 1.884(3) | Mn(3)-O(2)  | 1.881(3) |
| Mn(1)-N(1)  | 2.005(4) | Mn(3)-N(2)  | 1.992(4) |
| Mn(1)-O(3)  | 1.865(3) | Mn(3)-O(4)  | 1.881(3) |
| Mn(1)-O(11) | 1.956(4) | Mn(3)-O(7)  | 1.936(4) |
| Mn(1)-O(9)  | 2.183(3) | Mn(3)-O(5)  | 2.217(3) |
| Mn(1)-O(1w) | 2.317(4) | Mn(3)-O(2w) | 2.329(4) |
| Mn(2)-O(3)  | 2.157(3) | Mn(2)-O(8)  | 2.139(4) |
| Mn(2)-O(4)  | 2.143(3) | Mn(2)-O(10) | 2.197(4) |
| Mn(2)-O(6)  | 2.186(4) | Mn(2)-O(12) | 2.132(4) |

**Table S2.** Selected bond distances (Å) and angles (°) for complex **2**.

|            |            |            |            |
|------------|------------|------------|------------|
| Mn(1)-O(1) | 1.8960(14) | Mn(1)-O(3) | 2.3216(11) |
| Mn(1)-N(1) | 2.0060(13) | Mn(2)-O(2) | 2.1177(10) |
| Mn(1)-O(2) | 1.8714(13) | Mn(2)-O(5) | 2.2102(11) |
| Mn(1)-O(6) | 1.9471(12) | Mn(2)-O(7) | 2.1476(12) |
| Mn(1)-O(4) | 2.1775(10) |            |            |

**Table S3.** Coordination bond angles (°) for compounds **1-2**.

| <b>Complex 1</b>  |            |                   |            |
|-------------------|------------|-------------------|------------|
| O(3)-Mn(1)-O(1)   | 174.11(15) | O(4)-Mn(2)-O(6)   | 90.08(13)  |
| O(3)-Mn(1)-O(11)  | 96.69(14)  | O(3)-Mn(2)-O(6)   | 87.18(13)  |
| O(1)-Mn(1)-O(11)  | 89.00(15)  | O(12)-Mn(2)-O(10) | 91.68(15)  |
| O(3)-Mn(1)-N(1)   | 82.91(15)  | O(8)-Mn(2)-O(10)  | 88.86(16)  |
| O(1)-Mn(1)-N(1)   | 91.21(16)  | O(4)-Mn(2)-O(10)  | 91.19(13)  |
| O(11)-Mn(1)-N(1)  | 167.36(15) | O(3)-Mn(2)-O(10)  | 91.56(13)  |
| O(3)-Mn(1)-O(9)   | 93.16(13)  | O(6)-Mn(2)-O(10)  | 178.48(15) |
| O(1)-Mn(1)-O(9)   | 87.76(14)  | O(2)-Mn(3)-O(4)   | 174.04(14) |
| O(11)-Mn(1)-O(9)  | 95.70(14)  | O(2)-Mn(3)-O(7)   | 86.25(15)  |
| N(1)-Mn(1)-O(9)   | 96.94(15)  | O(4)-Mn(3)-O(7)   | 98.82(14)  |
| O(3)-Mn(1)-O(1w)  | 90.37(15)  | O(2)-Mn(3)-N(2)   | 91.36(16)  |
| O(1)-Mn(1)-O(1w)  | 89.02(15)  | O(4)-Mn(3)-N(2)   | 83.24(15)  |
| O(11)-Mn(1)-O(1w) | 81.06(15)  | O(7)-Mn(3)-N(2)   | 173.13(15) |
| N(1)-Mn(1)-O(1w)  | 86.31(16)  | O(2)-Mn(3)-O(5)   | 89.82(13)  |
| O(9)-Mn(1)-O(1w)  | 175.47(14) | O(4)-Mn(3)-O(5)   | 93.13(13)  |
| O(12)-Mn(2)-O(8)  | 176.99(13) | O(7)-Mn(3)-O(5)   | 91.68(14)  |
| O(12)-Mn(2)-O(4)  | 91.80(13)  | N(2)-Mn(3)-O(5)   | 94.76(15)  |
| O(8)-Mn(2)-O(4)   | 91.15(13)  | O(2)-Mn(3)-O(2w)  | 90.01(14)  |
| O(12)-Mn(2)-O(3)  | 87.72(13)  | O(4)-Mn(3)-O(2w)  | 87.38(14)  |
| O(8)-Mn(2)-O(3)   | 89.30(13)  | O(7)-Mn(3)-O(2w)  | 84.51(15)  |
| O(4)-Mn(2)-O(3)   | 177.22(13) | N(2)-Mn(3)-O(2w)  | 89.05(15)  |
| O(12)-Mn(2)-O(6)  | 89.10(15)  | O(5)-Mn(3)-O(2w)  | 176.19(14) |
| O(8)-Mn(2)-O(6)   | 90.29(16)  |                   |            |

| <b>Complex 2</b> |           |                   |           |
|------------------|-----------|-------------------|-----------|
| O(2)-Mn(1)-O(1)  | 173.18(4) | O(6)-Mn(1)-O(3)   | 81.76(4)  |
| O(2)-Mn(1)-O(6)  | 95.62(5)  | N(1)-Mn(1)-O(3)   | 86.22(5)  |
| O(1)-Mn(1)-O(6)  | 90.09(5)  | O(4)-Mn(1)-O(3)   | 176.83(4) |
| O(2)-Mn(1)-N(1)  | 82.97(5)  | O(2)-Mn(2)-O(2')  | 180.0     |
| O(1)-Mn(1)-N(1)  | 90.68(5)  | O(5)-Mn(2)-O(5')  | 180.0     |
| O(6)-Mn(1)-N(1)  | 167.97(4) | O(7')-Mn(2)-O(7') | 180.0     |
| O(2)-Mn(1)-O(4)  | 94.40(4)  | O(2)-Mn(2)-O(7)   | 88.19(5)  |
| O(1)-Mn(1)-O(4)  | 88.80(5)  | O(2)-Mn(2)-O(7')  | 91.81(5)  |
| O(6)-Mn(1)-O(4)  | 95.12(4)  | O(2)-Mn(2)-O(5)   | 93.53(5)  |
| N(1)-Mn(1)-O(4)  | 96.90(4)  | O(2)-Mn(2)-O(5')  | 86.47(5)  |
| O(2)-Mn(1)-O(3)  | 86.49(5)  | O(7)-Mn(2)-O(5)   | 90.70(5)  |
| O(1)-Mn(1)-O(3)  | 90.64(5)  | O(7)-Mn(2)-O(5')  | 89.30(5)  |
|                  |           |                   |           |

Primed atoms. at 1-x, -y, 1-z.

**Table S4.** H-bonding parameters for complexes **1** and **2**

| Complex 1   |          |          |           |           |       |               |
|-------------|----------|----------|-----------|-----------|-------|---------------|
| D-H         | d(D-H)   | d(H..A)  | d(D..A)   | d(D..A)   | A     | Symmetry      |
| O(1w)-H(21) | 0.75(8)  | 2.01(8)  | 2.750(12) | 171(8)    | O(7w) | 1-x, 1-y, 1-z |
| O(1w)-H(22) | 0.77(7)  | 1.95(7)  | 2.713(7)  | 174(7)    | O(6w) | 1+x, y, z     |
| O(2w)-H(11) | 0.86(5)  | 2.00(5)  | 2.852(7)  | 172(3)    | O(3w) | 2-x, -y, -z   |
| O(2w)-H(12) | 0.83(4)  | 1.99(4)  | 2.816(6)  | 178(8)    | O(3w) |               |
| O(3w)-H(31) | 0.85(4)  | 1.99(4)  | 2.838(5)  | 175(7)    | O(10) |               |
| O(3w)-H(32) | 0.85(5)  | 2.07(4)  | 2.869(6)  | 155(6)    | O(4w) | 1-x, 1-y, -z  |
| O(4w)-H(41) | 0.84(6)  | 2.23(5)  | 3.056(6)  | 168(7)    | O(9)  | -1+x, y, z    |
| O(4w)-H(42) | 0.83(7)  | 2.42(7)  | 3.127(6)  | 144(7)    | O(2)  | -1+x, 1+y, z  |
| O(5w)-H(51) | 0.84(7)  | 2.33(6)  | 3.026(7)  | 141(6)    | O(11) |               |
| O(5w)-H(52) | 0.83(4)  | 2.02(4)  | 2.854(67) | 180(11)   | O(5)  | x, 1+y, z     |
| O(6w)-H(61) | 0.81(7)  | 2.04(7)  | 2.843(6)  | 177(10)   | O(6)  | 1-x, 1-y, 1-z |
| O(6w)-H(62) | 0.75(6)  | 2.21(6)  | 2.948(7)  | 170(9)    | O(1w) | 1-x, 1-y, 1-z |
| O(7w)-H(71) | 0.92(12) | 1.89(14) | 2.673(9)  | 142(13)   | O(5w) | 1-x, 1-y, 1-z |
| O(7w)-H(72) | 0.72(11) |          |           |           | -     |               |
| Complex 2   |          |          |           |           |       |               |
| O(1s)-H(1s) | 0.82     | 2.01     | 2.806(2)  | 162       | O(5)  | 1-x,-y,1-z    |
| O(2s)-H(2s) | 0.82     | 2.09     | 2.890(3)  | 166       | O(4)  |               |
| O(3)-H(3a)  | 0.82(2)  | 1.89(2)  | 2.707(2)  | 176.3(17) | O(1s) |               |

**Table S5.** Details of X-band EPR experiments for complexes **1** and **2**

| Complex  | conditions                  | microwave frequency | modulation amplitude (mT) | BO-Sweep (mT) | sweep rate (S) |
|----------|-----------------------------|---------------------|---------------------------|---------------|----------------|
| <b>1</b> | 77 K, acetonitrile solution | 9.4429              | 200                       | 599.6         | 60             |
| <b>1</b> | solid state                 | 9.4347              | 200                       | 599.6         | 60             |
| <b>1</b> | 77 K, methanol medium       | 9.4431              | 200                       | 399.46        | 120            |
| <b>1</b> | 1:1(v/v) methanol-water     | 9.4434              | 200                       | 399.46        | 120            |
| <b>2</b> | 77 K, acetonitrile solution | 9.4437              | 200                       | 499.4         | 60             |
| <b>2</b> | solid state                 | 9.4447              | 200                       | 499.4         | 60             |
| <b>2</b> | 77 K, methanol medium       | 9.4413              | 200                       | 399.46        | 120            |
| <b>2</b> | 1:1 (v/v) methanol-water    | 9.4486              | 200                       | 399.46        | 120            |

**Table S6.** The rate ( $\text{M min}^{-1}$ ) of the complexes for catecholase-like activity at a concentration higher than 600 equivalents.

| Catalyst : Substrate Molar ratio | Complex 1             | Complex 2             |
|----------------------------------|-----------------------|-----------------------|
| 1 : 700                          | $1.56 \times 10^{-7}$ | $1.62 \times 10^{-7}$ |
| 1 : 800                          | $1.13 \times 10^{-7}$ | $1.39 \times 10^{-7}$ |
| 1 : 900                          | $1.01 \times 10^{-7}$ | $7.56 \times 10^{-8}$ |

**Table S7.** Initial rate ( $M \text{ min}^{-1}$ ) and the overall rate ( $M \text{ min}^{-1}$ ) of complexes **1** and **2** for pseudo zero order kinetics of catecholase-like activity in acetonitrile medium. The rates were obtained by dividing individual slopes and molar extinction coefficient ( $\epsilon$ ) of 3,5-DTBQ.

| Catalyst: Substrate | Complex <b>1</b>      |                       | Complex <b>2</b>      |                       |
|---------------------|-----------------------|-----------------------|-----------------------|-----------------------|
| Molar ratio         | Initial Rate          | Overall Rate          | Initial Rate          | Overall Rate          |
| 1:100               | $4.21 \times 10^{-6}$ | $3.16 \times 10^{-6}$ | $4.22 \times 10^{-6}$ | $3.17 \times 10^{-6}$ |
| 1:200               | $5.37 \times 10^{-6}$ | $3.28 \times 10^{-6}$ | $5.36 \times 10^{-6}$ | $3.29 \times 10^{-6}$ |
| 1:300               | $5.74 \times 10^{-6}$ | $3.49 \times 10^{-6}$ | $5.95 \times 10^{-6}$ | $3.24 \times 10^{-6}$ |
| 1:400               | $6.21 \times 10^{-6}$ | $3.59 \times 10^{-6}$ | $6.37 \times 10^{-6}$ | $3.31 \times 10^{-6}$ |
| 1:500               | $6.42 \times 10^{-6}$ | $3.72 \times 10^{-6}$ | $6.84 \times 10^{-6}$ | $3.30 \times 10^{-6}$ |
| 1:600               | $6.89 \times 10^{-6}$ | $3.67 \times 10^{-6}$ | $6.90 \times 10^{-6}$ | $3.46 \times 10^{-6}$ |

**Table S8.** Crystal data and details of structure refinements for compounds **1-2**.

|                                              | <b>1</b>                        | <b>2</b>                        |
|----------------------------------------------|---------------------------------|---------------------------------|
| CCDC Number                                  | 1916631                         | 1916632                         |
| Empirical formula                            | $C_{30}H_{50}Br_2Mn_3N_2O_{19}$ | $C_{35}H_{54}Br_4Mn_3N_2O_{17}$ |
| Formula weight                               | 1067.36                         | 1259.26                         |
| Crystal system                               | Triclinic                       | Triclinic                       |
| Space group                                  | $P\bar{1}$                      | $P\bar{1}$                      |
| $a$ (Å)                                      | 10.981(5)                       | 8.2310(16)                      |
| $b$ (Å)                                      | 11.954(5)                       | 12.816(3)                       |
| $c$ (Å)                                      | 17.826(5)                       | 13.335(3)                       |
| $\alpha$ (deg)                               | 100.945(5)                      | 61.78(3)                        |
| $\beta$ (deg)                                | 90.352(5)                       | 85.43(3)                        |
| $\gamma$ (deg)                               | 108.241(5)                      | 73.33(3)                        |
| Volume (Å <sup>3</sup> )                     | 2176.5(15)                      | 1184.9(5)                       |
| $Z$                                          | 2                               | 1                               |
| $D_{\text{calcd}}$ (g cm <sup>-3</sup> )     | 1.629                           | 1.765                           |
| $\mu$ Mo-K $\alpha$ , (mm <sup>-1</sup> )    | 2.765                           | 3.972                           |
| $F(000)$                                     | 1082                            | 627                             |
| $\theta_{\text{max}}$ (°)                    | 25.15                           | 29.71                           |
| Reflns collected                             | 31467                           | 24638                           |
| Unique reflections                           | 7641                            | 7015                            |
| $R_{\text{int}}$                             | 0.0738                          | 0.0521                          |
| Observed $I > 2\sigma(I)$                    | 4840                            | 6833                            |
| Parameters                                   | 555                             | 296                             |
| Goodness of fit ( $F^2$ )                    | 1.035                           | 1.159                           |
| $R1/wR2$ ( $I > 2\sigma(I)$ ) <sup>[a]</sup> | 0.0484/ 0.1046                  | 0.0271/ 0.0657                  |
| $\Delta\rho$ (e/Å <sup>3</sup> )             | 0.733, -0.577                   | 0.538, -1.089                   |

$$^{[a]}R1 = \sum | |F_o| - |F_c| | / \sum |F_o|, wR2 = [\sum w (F_o^2 - F_c^2)^2 / \sum w (F_o^2)^2]^{1/2}$$

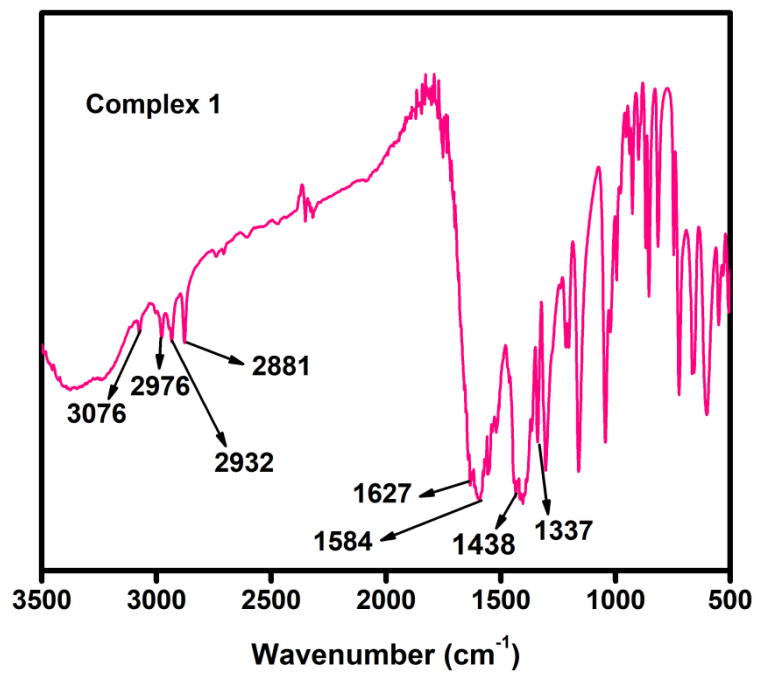

**Fig. S1.** FT-IR spectrum of complex 1.

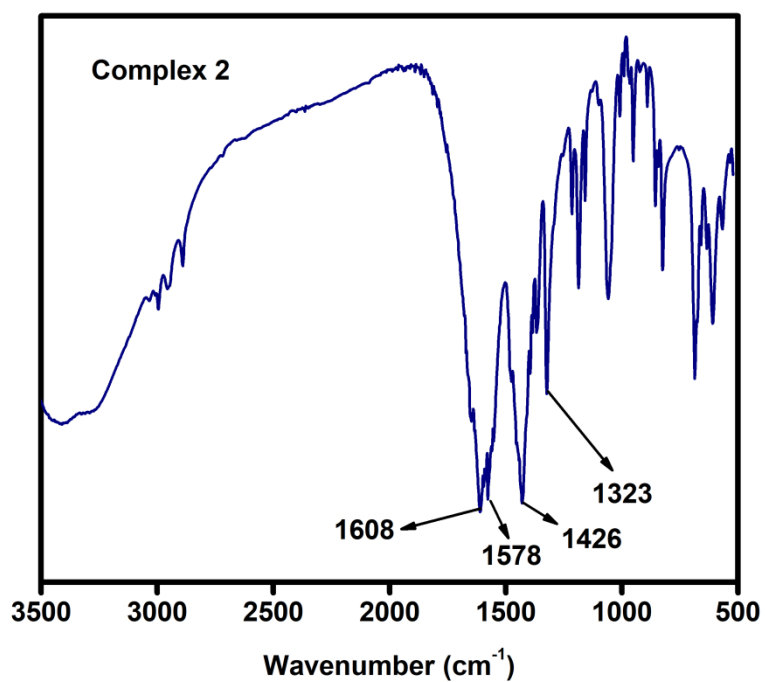

**Fig. S2.** FT-IR spectrum of complex 2.

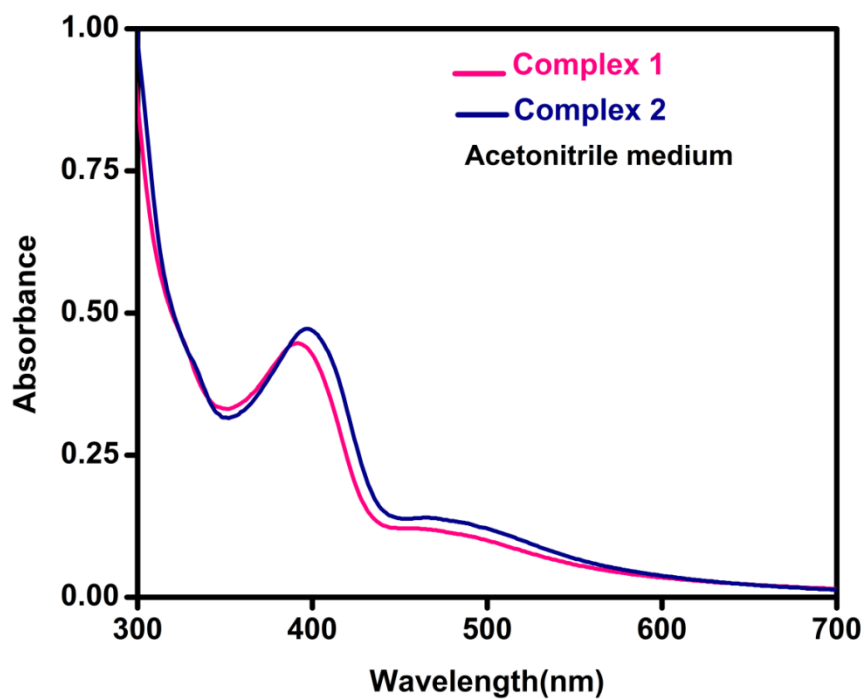

Fig. S3. UV-Vis spectra of complexes 1 and 2 in acetonitrile medium.

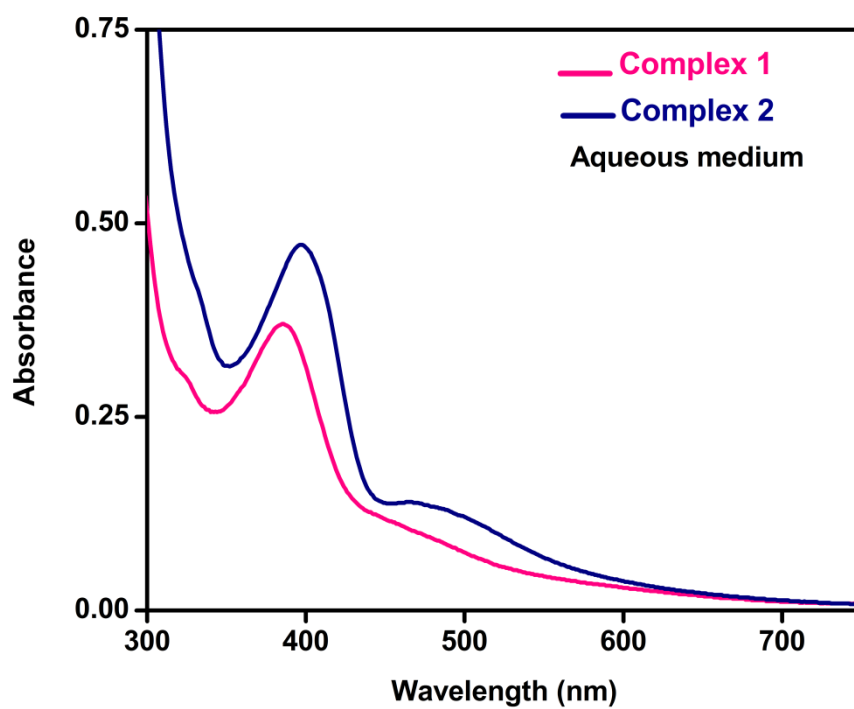

Fig. S4. UV-Vis spectra of complexes 1 and 2 in aqueous medium.

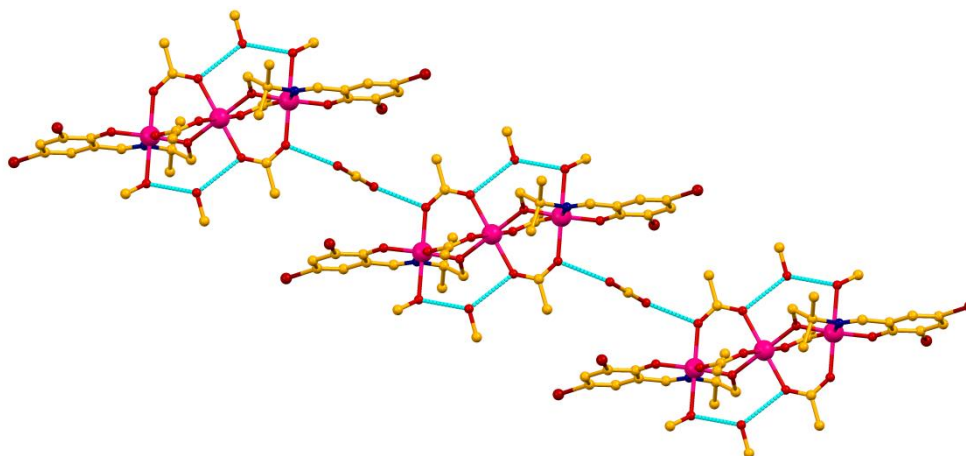

**Fig. S5.** Hydrogen bonding interactions in complex **2** viewed along b axis.

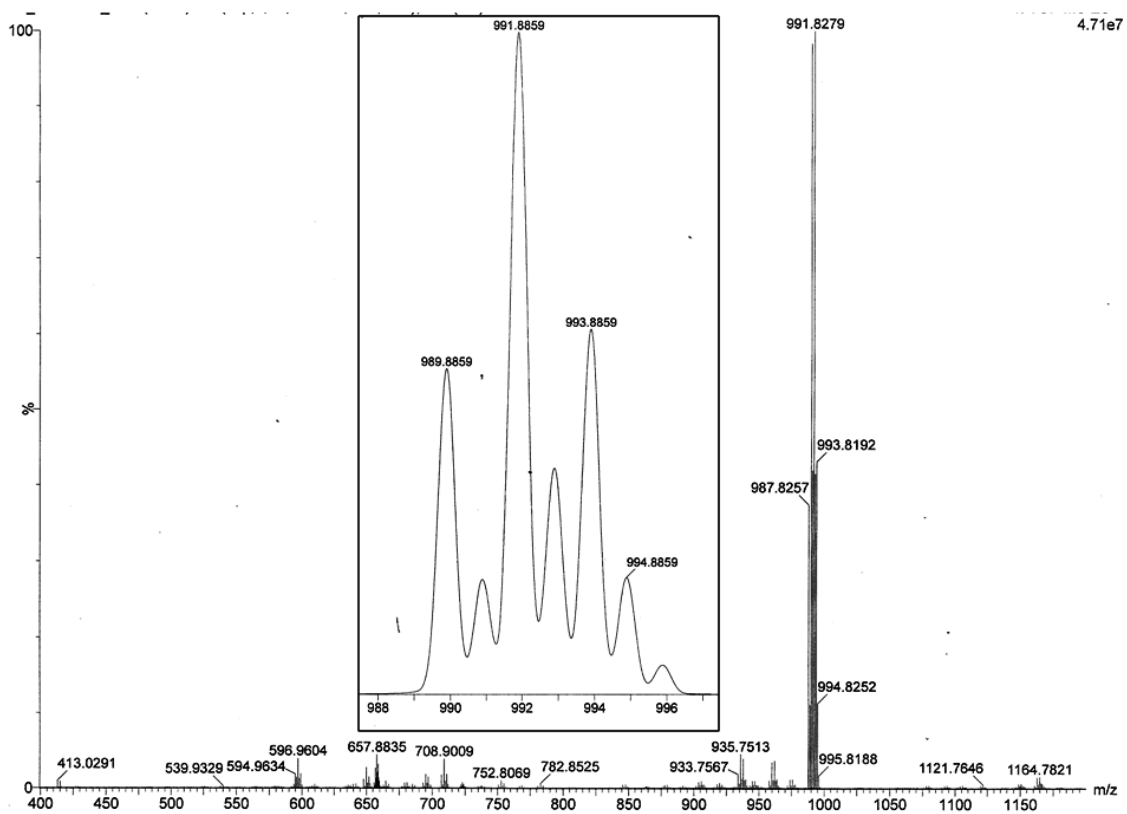

**Fig. S6.** ESI-MS spectrum of complex **1** in acetonitrile medium.

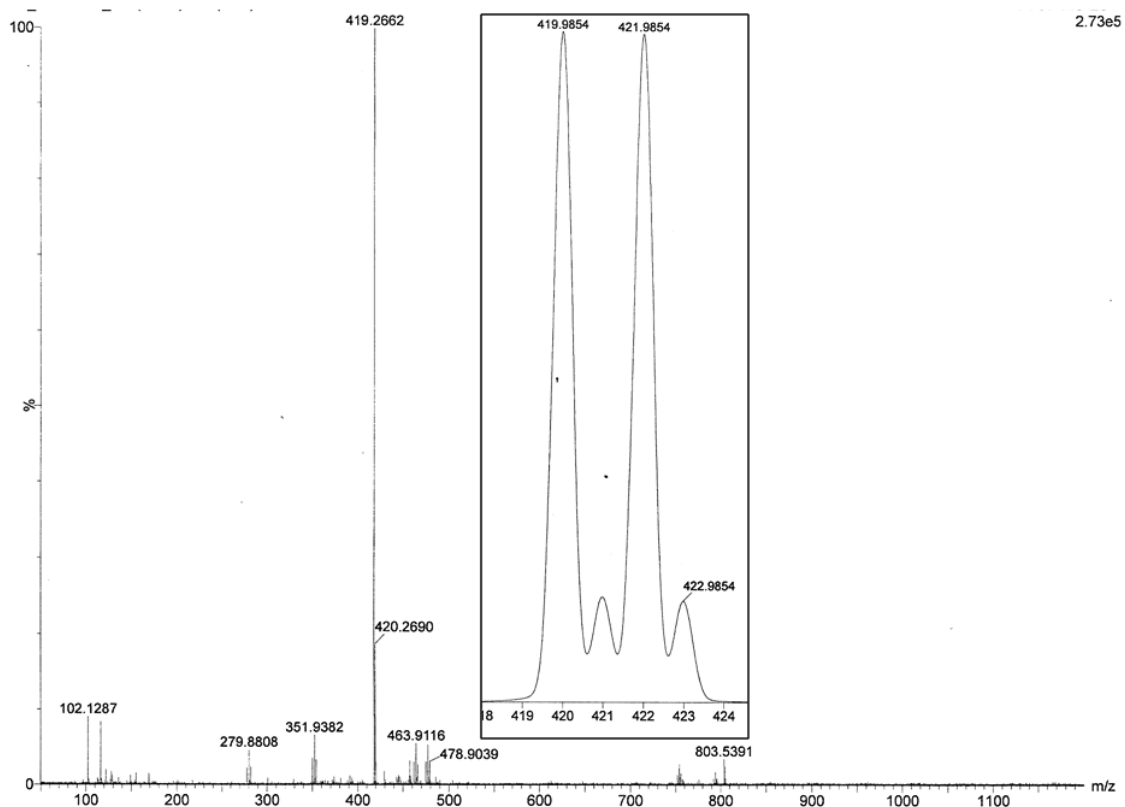

**Fig. S7.** ESI-MS spectrum of complex **1** in an aqueous medium.

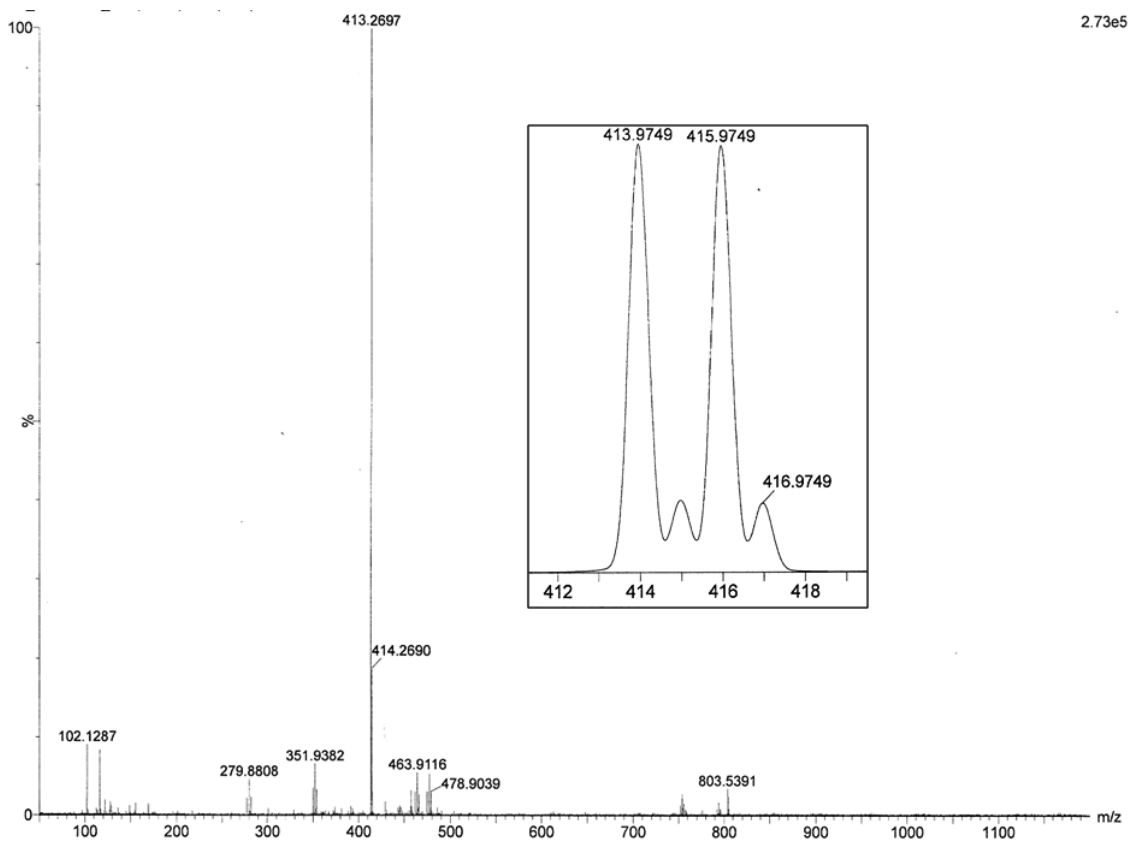

**Fig. S8.** ESI-MS spectrum of complex **1** in methanol medium.



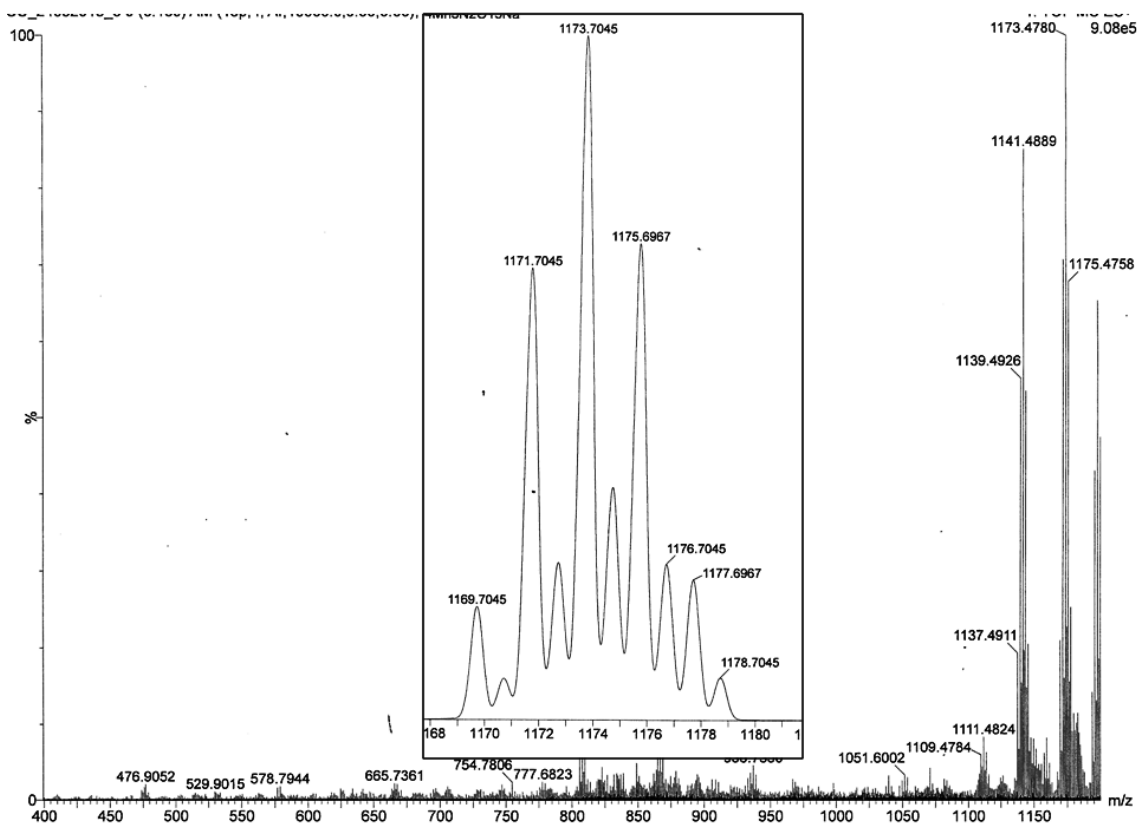

**Fig. S9.** ESI-MS spectrum of complex **2** in acetonitrile medium.

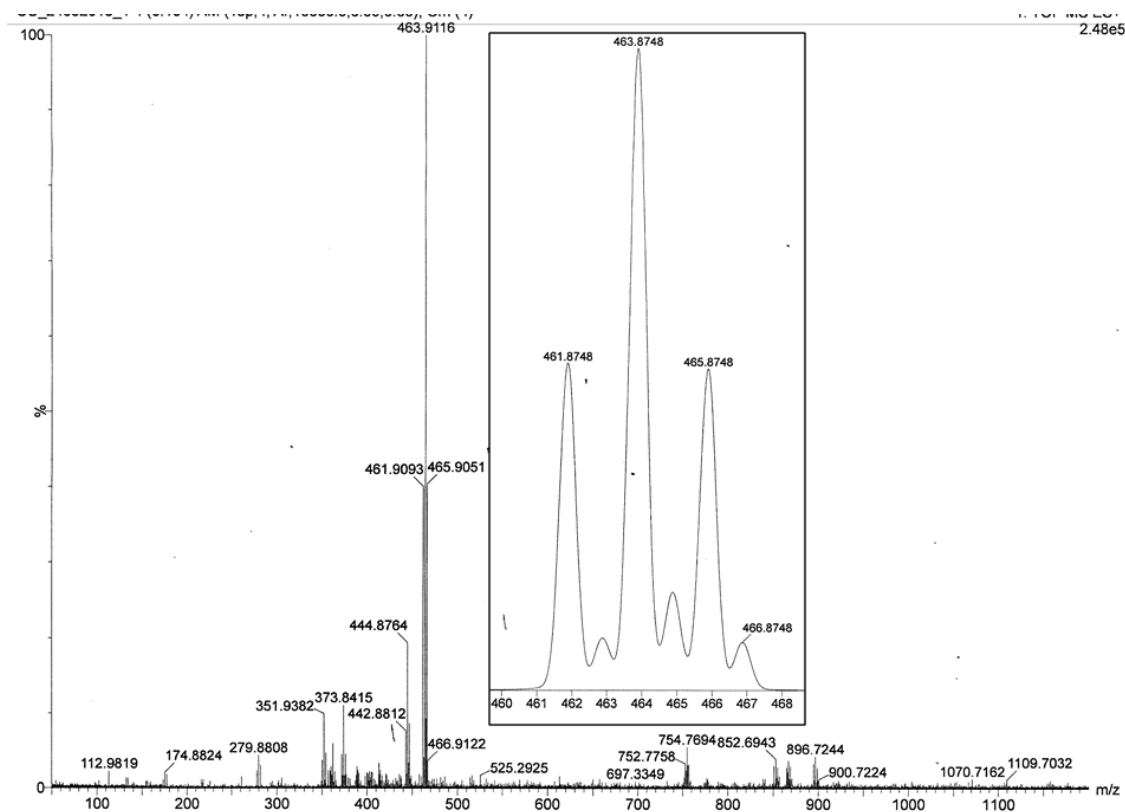

**Fig. S10** ESI-MS spectrum of complex **2** in an aqueous medium.

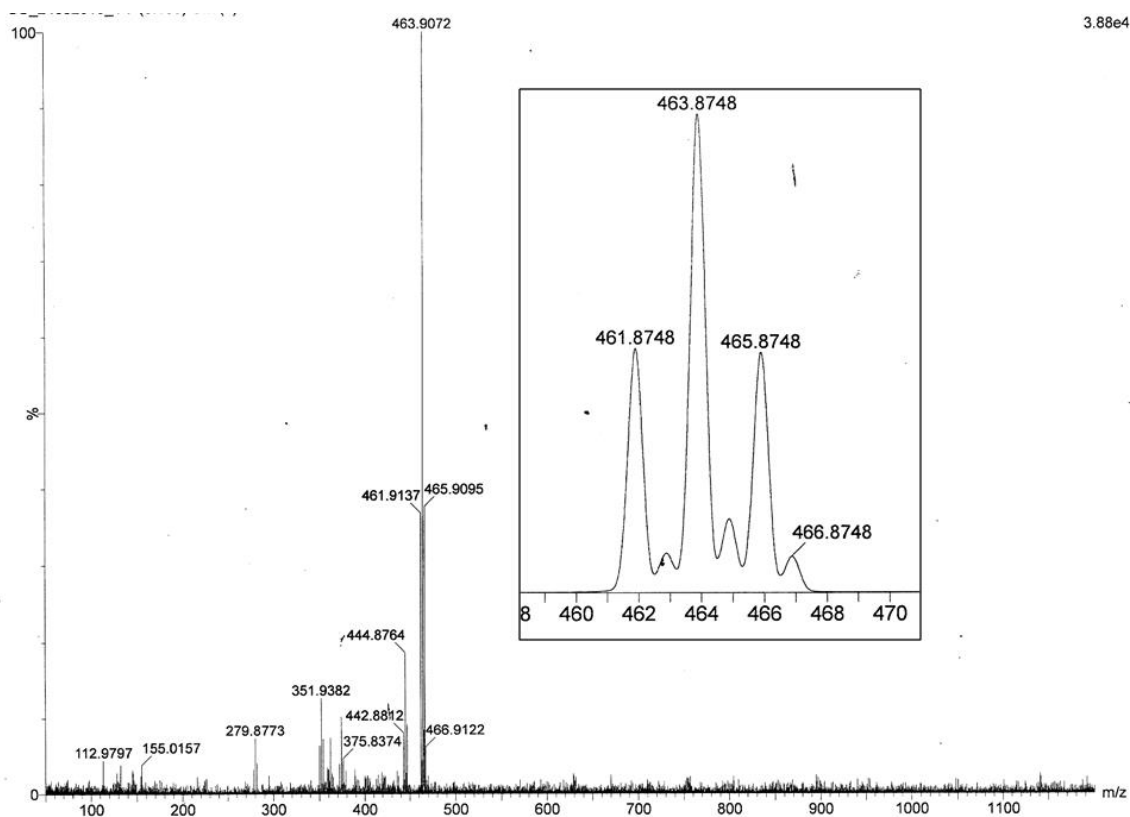

**Fig. S11** ESI-MS spectrum of complex **2** in methanol medium.

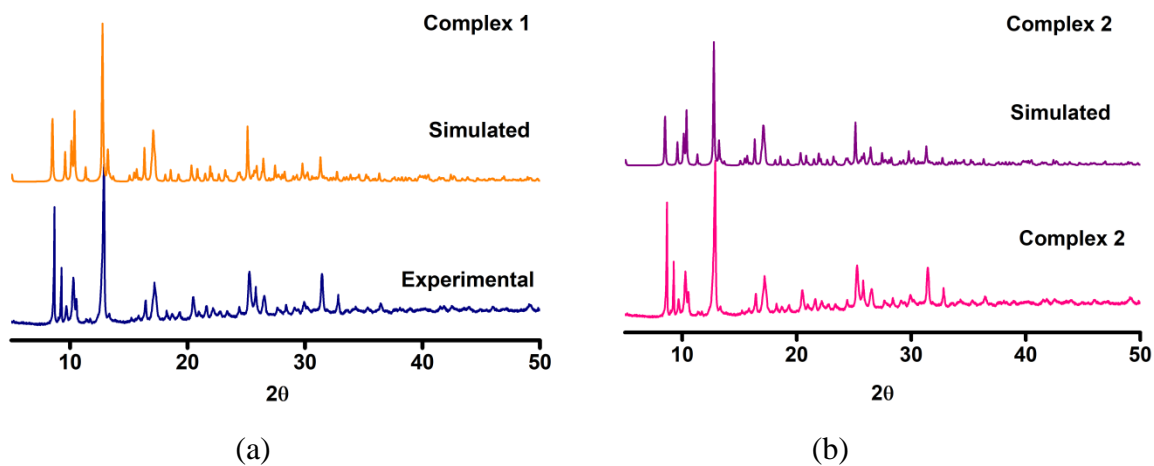

**Fig. S12.** Powder X-ray diffraction pattern of (a) complex **1** and (b) complex **2**.

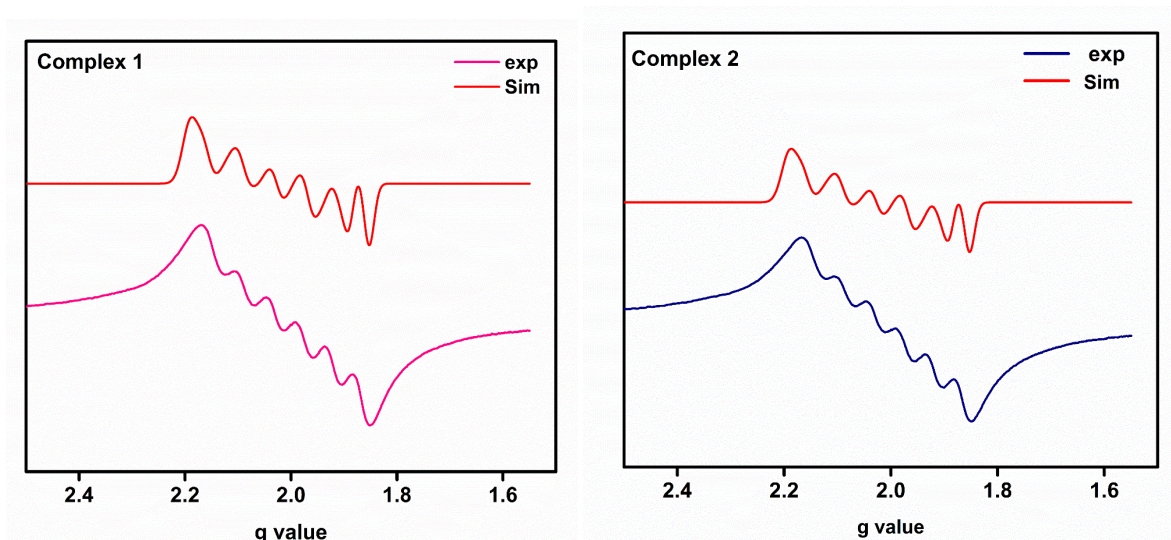

**Fig. S13.** X-Band EPR spectra of complexes **1** and **2** in methanol medium at 77 K.

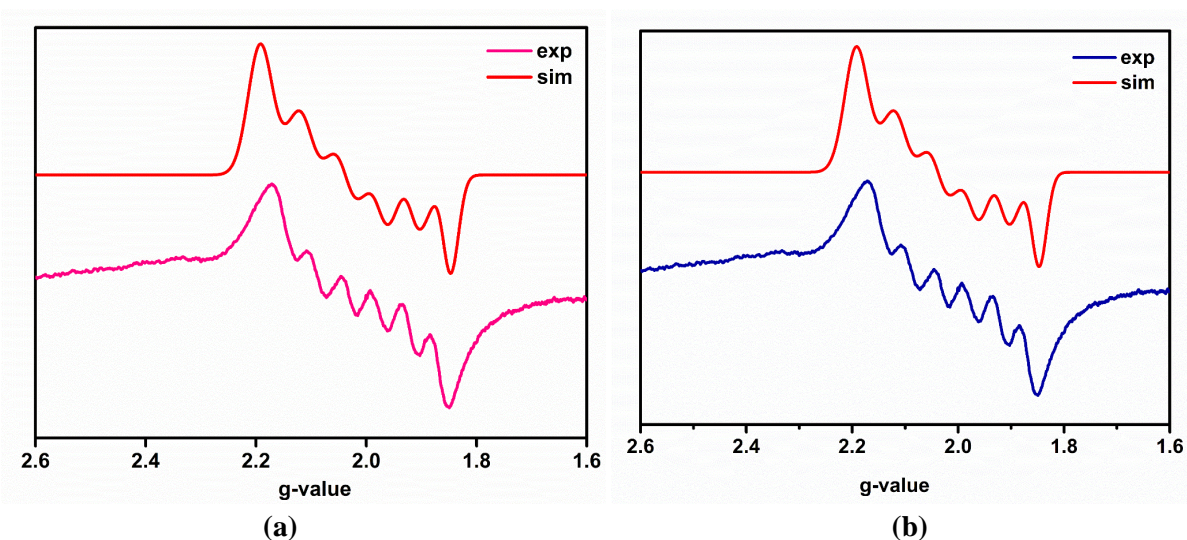

**Fig. S14.** X-Band EPR spectra of complexes (a) **1** and (b) **2** in 1:1(v/v) methanol-water medium at 77 K.

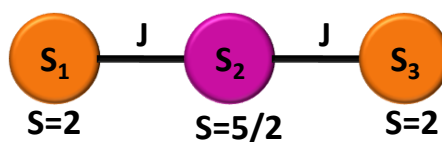

**Fig. S15.** Model used to fit the  $\chi_{MT}$  vs.  $T$  plot of complexes **1** and **2**.

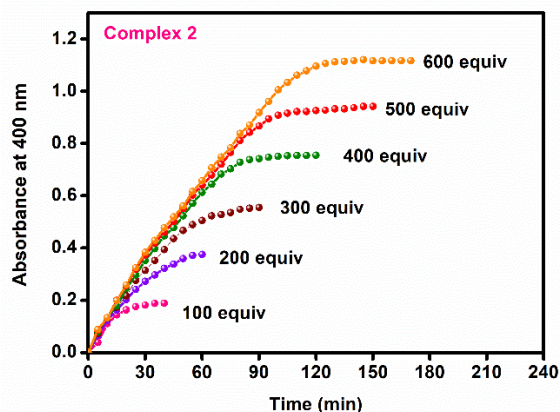

**Fig. S16.** Increased absorbance at 400 nm at different substrate concentrations catalyzed by complex 2 in acetonitrile medium at 25 °C.

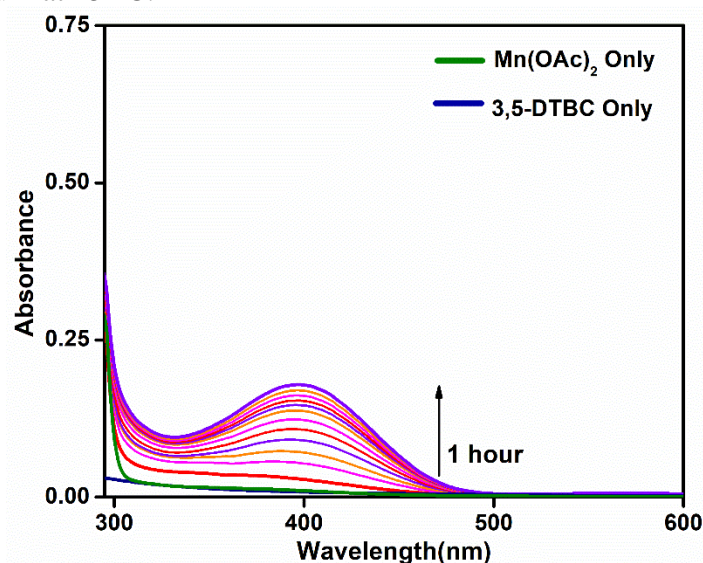

**Fig. S17** Oxidation of 3,5-DTBC catalyzed by manganese(II) acetate monitored by UV-Vis spectroscopy in acetonitrile medium at 25 °C.

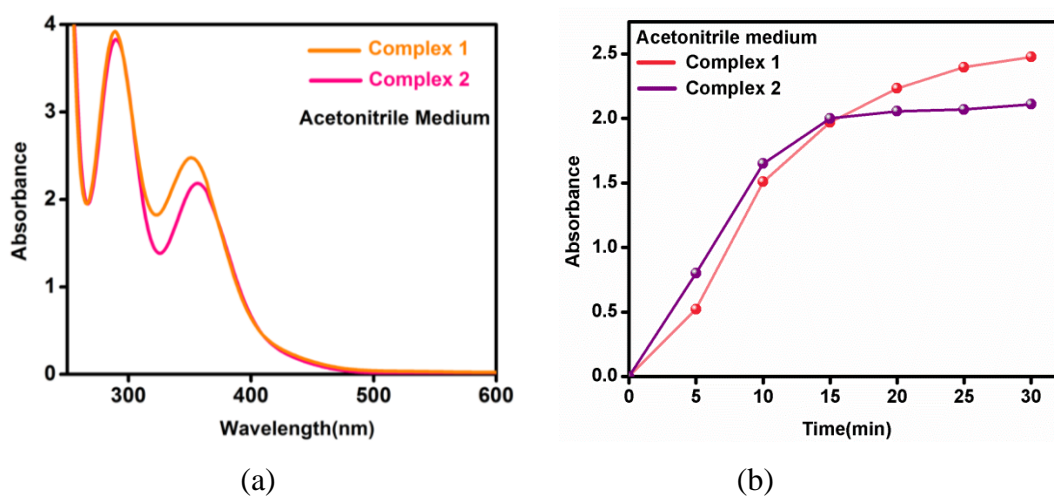

**Fig. S18.** (a) Detection of  $\text{H}_2\text{O}_2$  by UV-Vis spectroscopy during oxidation of 3,5-DTBC catalyzed by complexes 1 and 2 in acetonitrile; (b) Release of  $\text{H}_2\text{O}_2$  during the catalytic reaction for complexes 1 and 2 in acetonitrile. The change in absorbance with time was measured at  $\lambda_{\text{max}} \sim 351$  and 356 nm for 1 and 2, respectively.

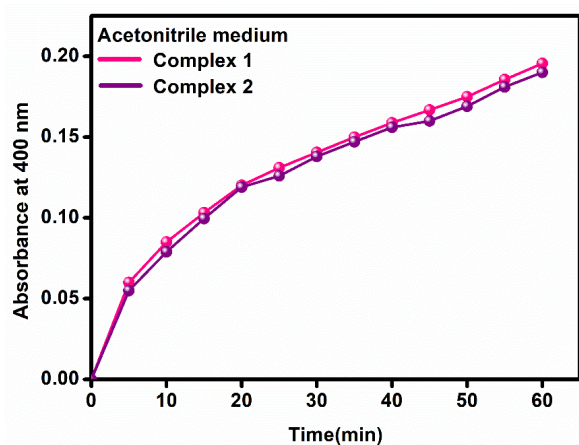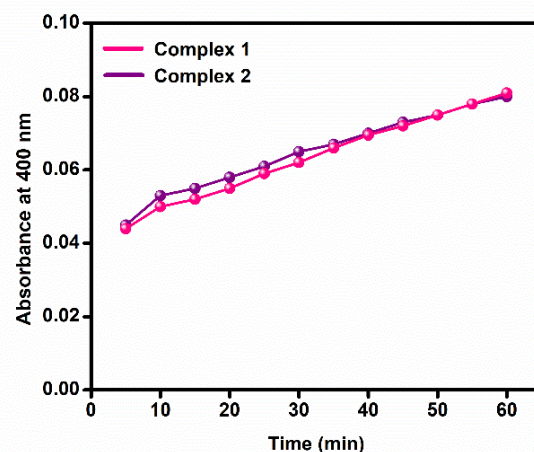

(a)

(b)

**Fig. S19.** Monitoring of absorbance at 400 nm in the presence of (a) TEMPO and (b) sodium azide through the catalysis with complexes **1** and **2**.

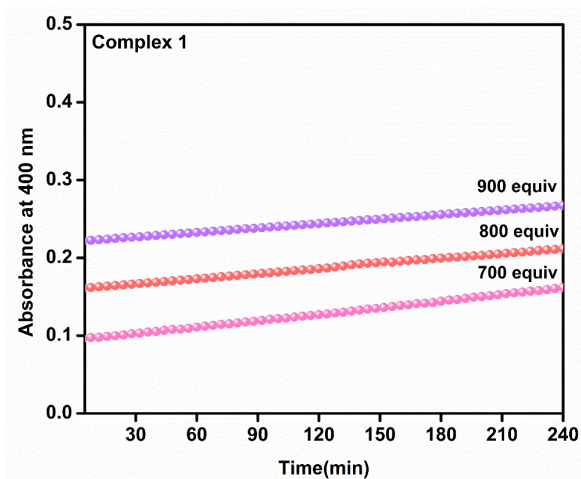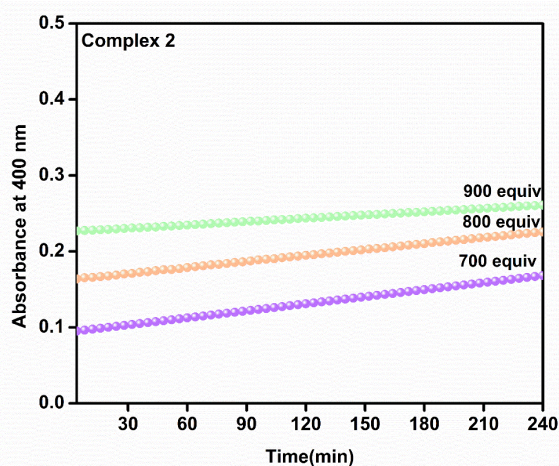

**Fig. S20.** Increasing absorbance at 400 nm at different substrate concentrations (higher than 600 equivalents) through the catalysis with complexes **1** and **2** in acetonitrile at 25 °C.

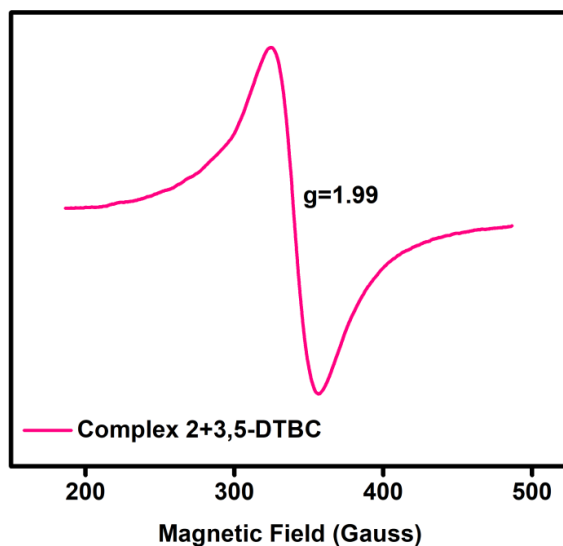

**Fig. S21.** X-Band EPR spectrum of complex **2** in the presence of 3,5-DTBC in acetonitrile at 77 K.

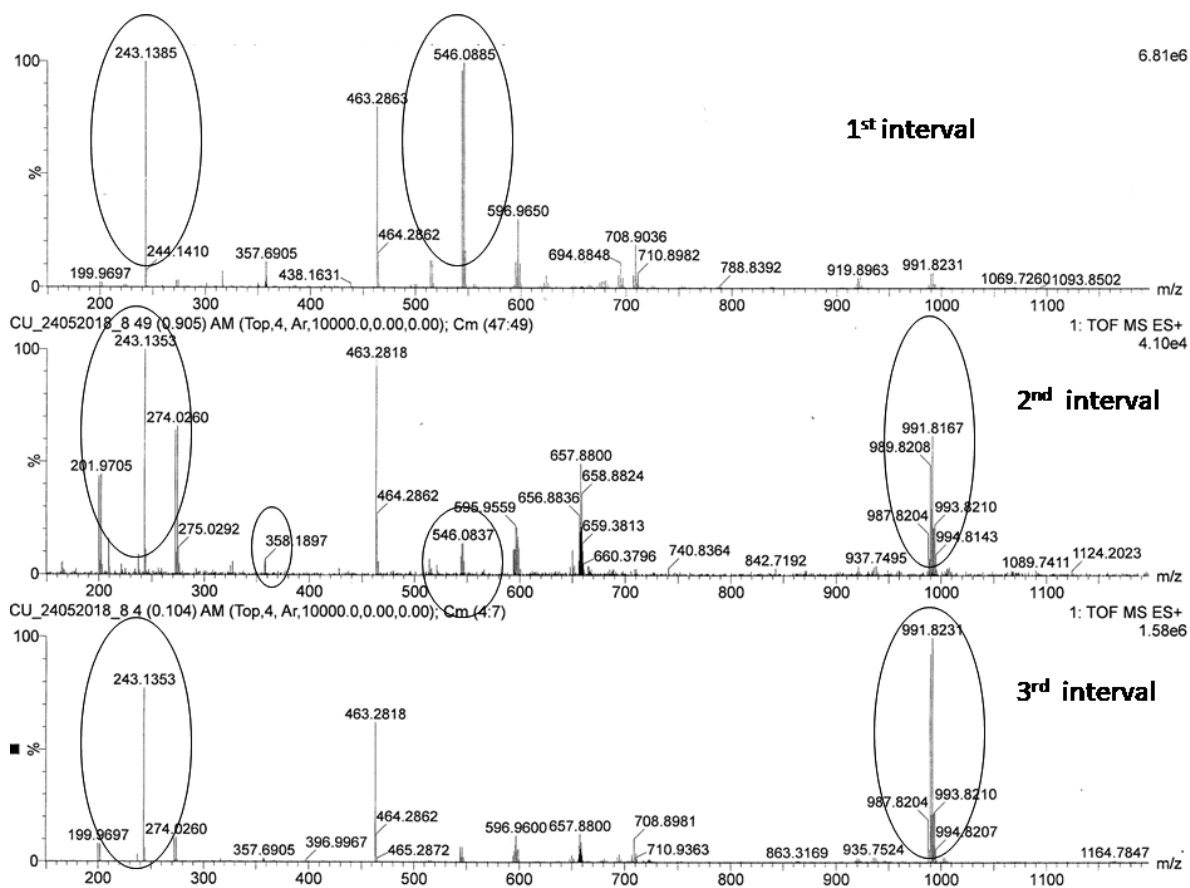

**Fig. S22.** ESI-MS spectrum of the reaction mixture of complex **1** and 3,5-DTBC in acetonitrile medium at a different time interval.

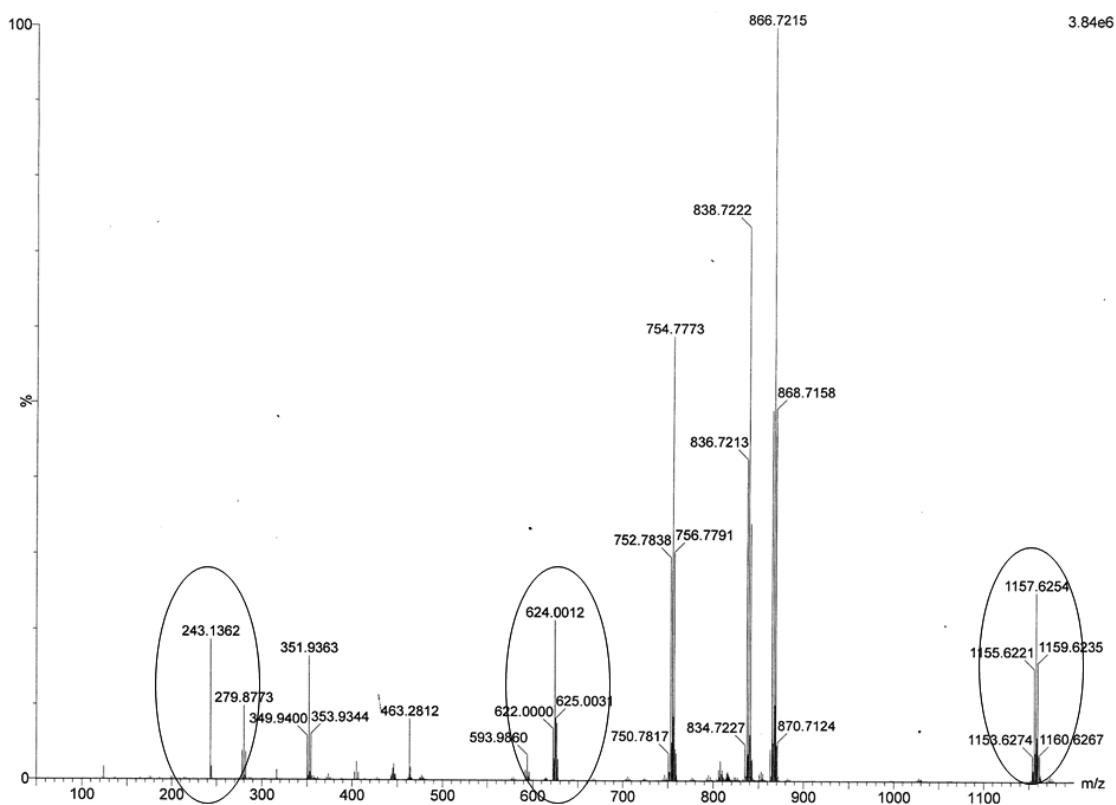

**Fig. S23.** ESI-MS spectrum of the reaction mixture of complex **2** and 3,5-DTBC in acetonitrile.

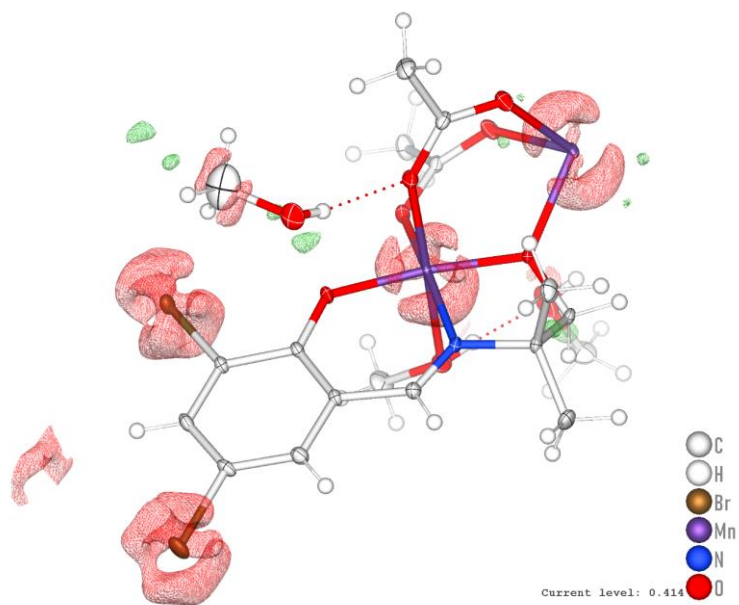

**Fig. S24.** Residual density map of complex **2**.

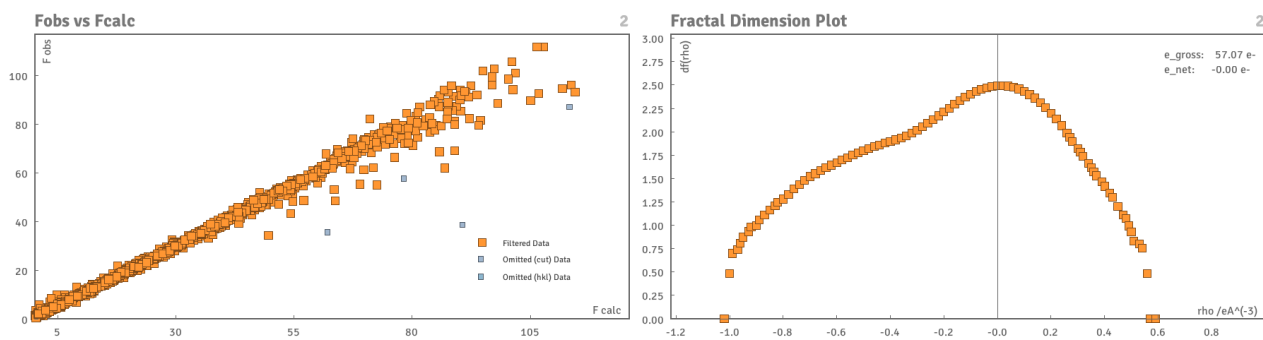

**Fig. S25.** Fobs vs Fcalc and Fractal Dimension Plot of complex **2**. (According to K. Meindl and J. Henn (2008), Acta Cryst. A64, 404-418)
